# Supplementary material for: Effects of ‘The Vicious Worm’ educational software on Taenia solium knowledge among key pork supply chain workers in Zambia
Source: PubMed Central journal article supplement (PMC7595624; doi:10.1371/journal.pntd.0008790), 2020-10-19
Supplement: pntd.0008790.s004.pdf [file pntd.0008790.s004.pdf]

# Observation checklist

Is meat inspection performed?

---

---

---

What kind of inspection do they do?

---

---

---

Do they hang up the pigs when they are killed to prevent contamination?

---

---

---

Do they wash their hands between the different carcasses?

---

---

---

Do they wash and disinfect their knives and other utensils used between different carcasses?  
(e.g. in boiling water)

---

---

---

Do they clean and disinfect the working surfaces between the different carcasses?

---

---

---

Do they inspect all carcasses or a random selection?

---

---

---

What kind of hygienic protection do they wear?

---

---

---

Do you see any carcasses or parts of them that will be destroyed/ are being destroyed? Do you see a place/equipment for incineration?

---

---

---

Does the slaughter place provide enough facility for the disposal of slaughter waste and wastewater?

---

---

---

Are there people in the slaughterhouse that should not be there?

---

---

---

Is there a system in place to track the meat?

---

---

---

Is the slaughter area sealed off from the outside?

---

---

---

Is there a cold chain? How is meat stored?

---

---

---

Other observations? (Pest control, transport of meat, ...)

---

---

---
